# Supplementary material
Source: PubMed Central journal article supplement (PMC3271578)
Supplement: cr201180x1.pdf [file cr201180x1.pdf]

## Supplementary information, Figure S1

MLRRILQRTPGRVGSQGSDDLSSATPINTVDVNNESSEGFICPQCMKSLGSADELFKHYEAVHDAGNDS  
GHGGESNLALKRDDVTLRQEVQDLQASLKEEKWYSEELKKELEKYQGLQQQEAQPDGLVTDSSAELQSL  
EQQLEEAQTENFNKQMKDLFEQKAAQLATEIADIKSKYDEERSLREAAEQVTRLTEELNKEATVIQDLKTE  
LLQRPGIEDVAVLKELVQVQTLMDNMTLERERESEKLKDECKKLQSQYASSEATISQLRSELAKGPQEVA  
VYVQELQKLKNQTLTENLLKKEQDYTKLEEKHNEESVSKKNIQATLHQKDLDCQQLSRLSASETSLHRIHV  
ELSEKGEATQKLKEELSEVETKYQHLKAEFKLQQQREEKEQHGLQLQSEINQLHSKLLETERQLGEAHGR  
LKEQRLSSEKLMDKEQQVADLQLKLSRLEEQLKEKVTNSTELQHLDKTKQQHQEQQALQQSTTAKLRE  
AQNDLEQVLRQIGDKDQKIQNLEALLQKSKENISLLEKEREDLYAKIQAGEGETAVLNQLQEKNHNTLQEQV  
TQLTEKLKNQSESHKQAQENLHDQVQEQAHLRAAQDRVLSLETSVNELNSQLNESKEKVSQLDIQIKAKT  
ELLLSAEAAKTAQRADLQNHLDTAQNALQDKQELNKITTQLDQVTAKLQDKQEHCQSLESHLKEYKEY  
LSLEQKTEELEGGIKLEADSLEVKASKEQALQDLQQQRQLNTDLELRATELSKQLEMEKEIVSSTRDLQK  
KSEALESIKKLTQKEEEKQILKQDFETLSQETKIQHEELNNRIQTTVTELQKVKMEKEALMTELSTVKDKLSK  
VSDSLKNSKSEFEKENQKGAAILDLEKTCKELKHQLQVQMENTLKEQKELKKSLEKEKEASHQLKLELNSM  
QEQLIQANTLKQNEKEEQQLQGNINELKQSSEQKKKQIEALQGELKIAVLQKTELENKLQQQLTQAAQELA  
AEKEKISVLQNNYEKSQETFKQLQSDFYGRESELLATRQDLKSVEEKLSLAQEDLISNRNQIGNQNKLIQELK  
TAKATLEQDSAKKEQQLQERCKALQDIQKEKSLKEKELVNEKSKLAEIEEIKCRQEKEITKLNEELKSHKLESI  
KEITNLKDAKQLLIQKLELQGKADSLKAAVEQEKRNNQILKDQVKKEEELKKEFIEKEAKLHSEIKEKEVGM  
KKHEENEAKLTMQITALNENLGTVKKQWSSQRRVSELEKQTDDLGRGEIIVLEATVQNNQDERRALLERCL  
KGEGEIEKLQTKVLELQRKLDNTTAAVQELGRENQSLQIKHTQALNRKWAEDNEVQNCMACGKGFSVTVR  
RHHCRQCGNIFCAECSAKNALTPSSKKPVRVCDACFNDLQG

**Figure S1** Identification of EEA1 as a p97 binding protein. Shown is the amino acid sequence of EEA1. Peptides identified by mass spectrometry are shown in red and blue.
