# Supplementary material
Source: PubMed Central journal article supplement (PMC3271578)
Supplement: cr201180x5.pdf [file cr201180x5.pdf]

Supplementary information, Figure S5

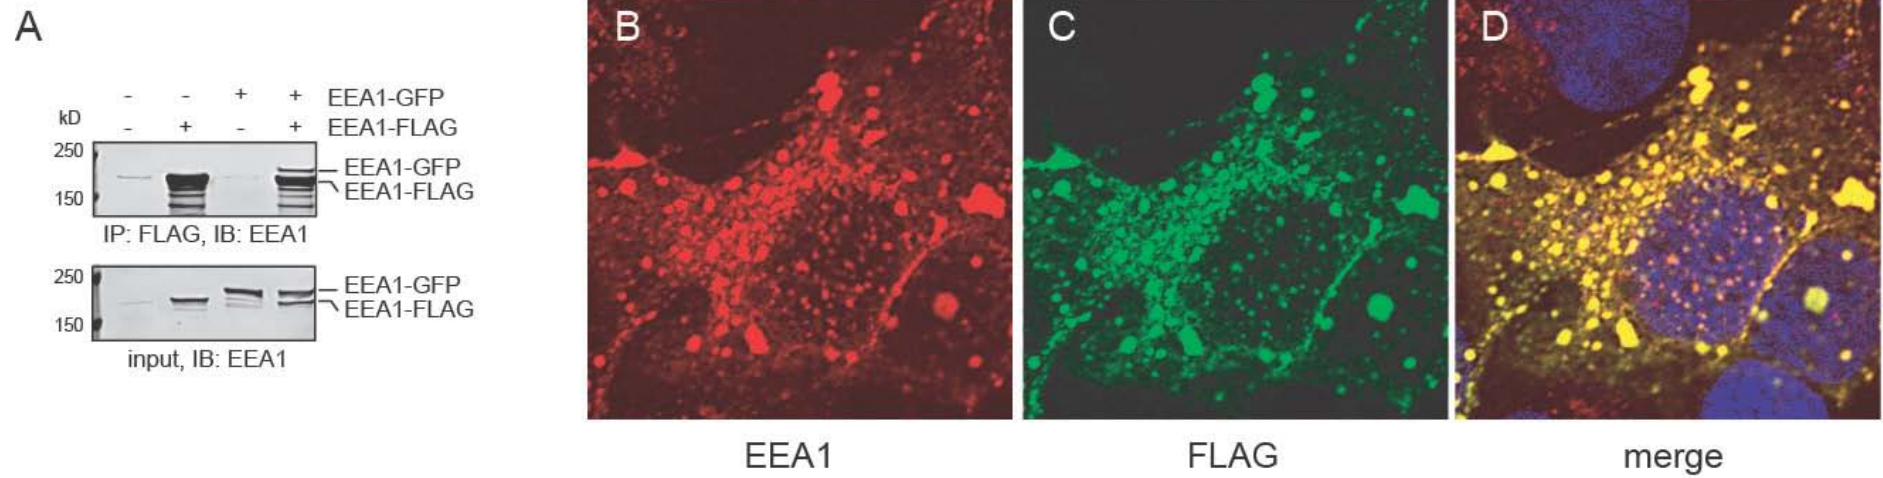

**Figure S5** EEA1-expressing cells contain enlarged early endosomes. Cells transfected with an EEA1-FLAG expressing plasmid were stained with antibodies against EEA1 and FLAG.
