# Supplementary material
Source: PubMed Central journal article supplement (PMC3271578)
Supplement: cr201180x6.pdf [file cr201180x6.pdf]

## Supplementary information, Table S1

|                   |                                                                       |
|-------------------|-----------------------------------------------------------------------|
| $\Delta$ C2H2 Fwd | 5' – tgttcatgatgctggaatgacGCGATCGCCATGtcaggtcatggaggagagtctaac – 3'   |
| $\Delta$ C2H2 Rev | 5' – gattagactctcctccatgacctgaCATGGCGATCGCgtcattaccagcatcatgaaca – 3' |
| $\Delta$ N402 Fwd | 5' – agttaagcagctacaacaacagGCGATCGCCATGagagaagaaaaggagcagcatgg – 3'   |
| $\Delta$ N402 Rev | 5' – ccatgctgctcctttctctctCATGGCGATCGCctgtgttagctgcttaaact – 3'       |
| $\Delta$ FYVE Fwd | 5' – tacacaagcgttgaatagaaagACGCGTtgggccgaagacaatgaagtac – 3'          |
| $\Delta$ FYVE Rev | 5' – gtacttcattgtcttcggcccaACGCGTctttctattcaacgcttgta – 3'            |

**Data S1** Primer sequences used to construct EEA1 deletion mutants
